# Supplementary material for: Corrosion Behaviour of Nodular Cast Iron Used for Rotor Manufacturing in Different Wastewaters
Source: MDPI journal article supplement (doi:10.3390/coatings12070911), 2022-06-28
Supplement: s1 [file s1]

Archive with 1 entries (1 files):
- coatings-1780376-supplementary.pdf
