# Supplementary material for: Corrosion Behaviour of Nodular Cast Iron Used for Rotor Manufacturing in Different Wastewaters
Source: MDPI journal article supplement (doi:10.3390/coatings12070911), 2022-06-28
Supplement: s1 [file s1 › coatings-1780376-supplementary.pdf]

Supplementary Materials

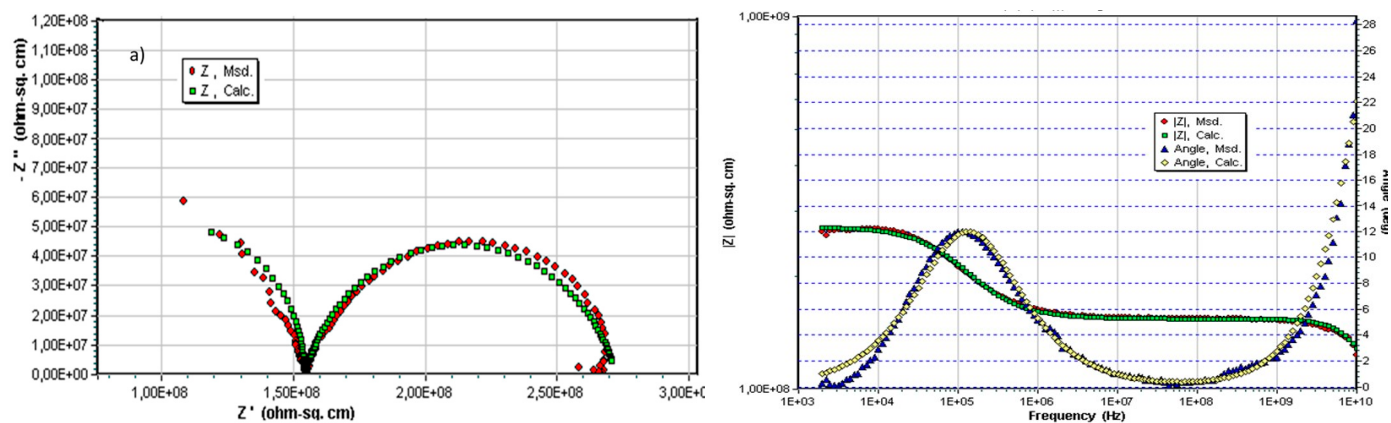

Figure S1. The Nyquist (a) and Bode (b) diagram after 1 hour of immersion in DWWW-1.

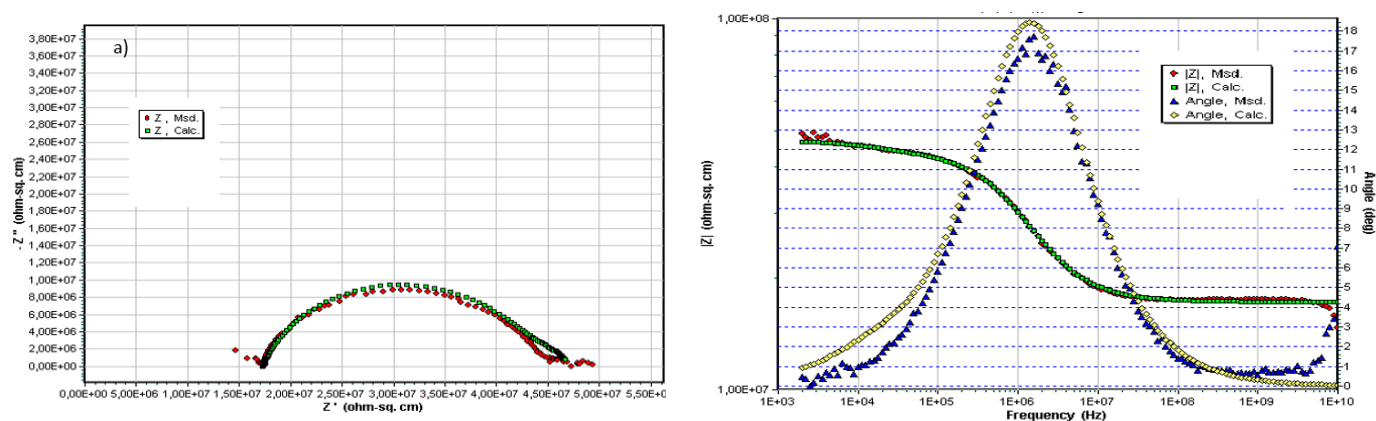

Figure S2. The Nyquist (a) and Bode (b) diagram after 1 hour of immersion in DWWW-2.

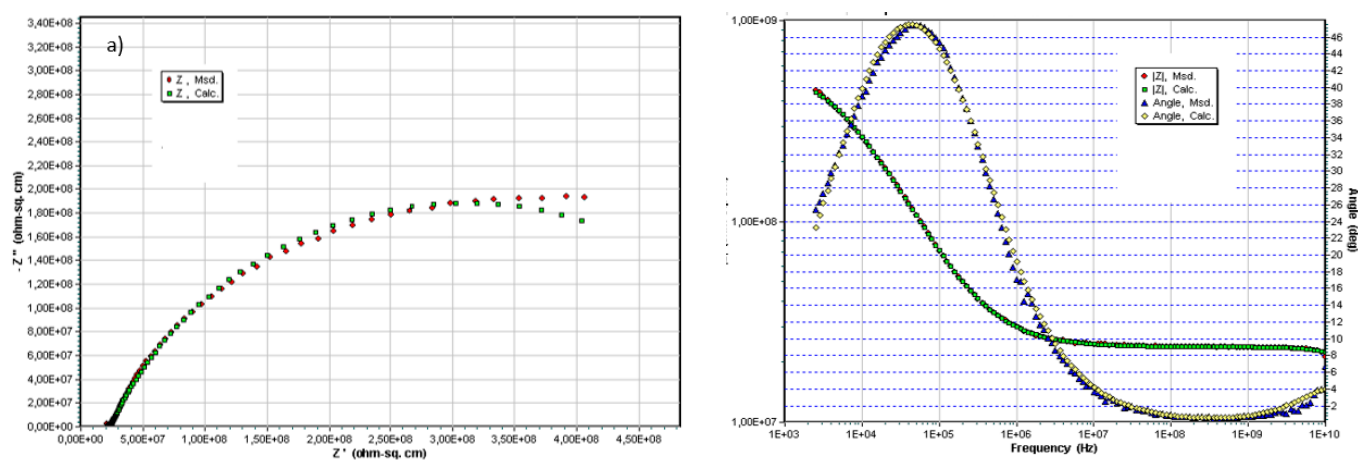

Figure S3. The Nyquist (a) and Bode (b) diagram after 1 hour of immersion in DWWW-3.

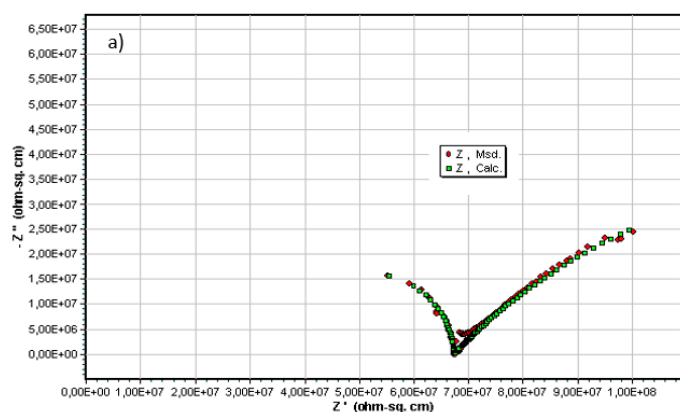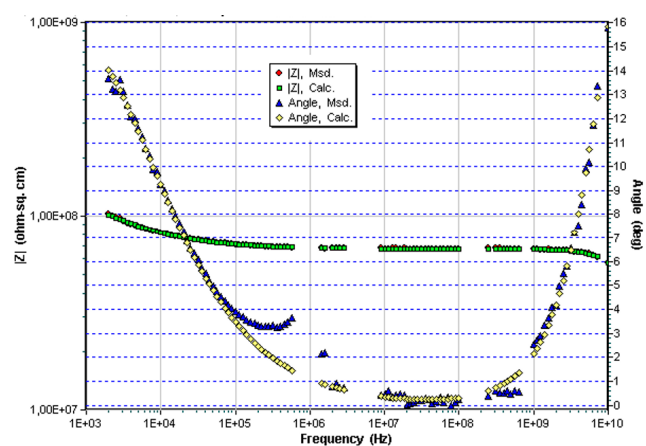

Figure S4. The Nyquist (a) and Bode (b) diagram after 30 days of immersion in DWWW-1.

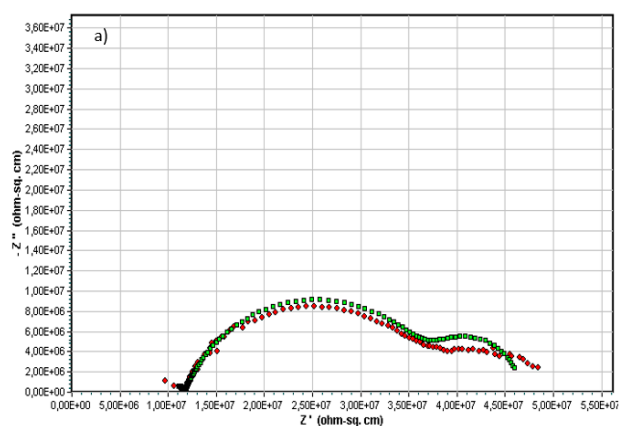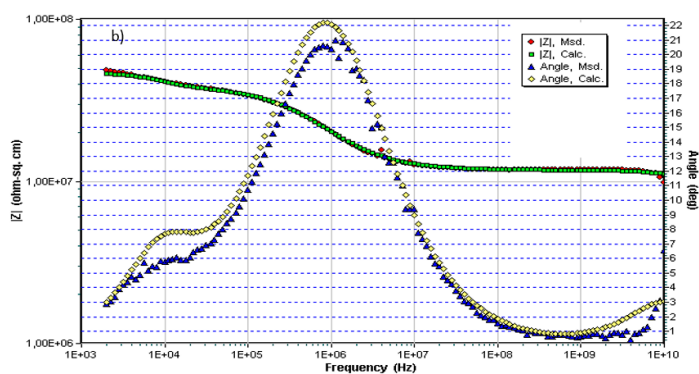

Figure S5. The Nyquist (a) and Bode (b) diagram after 30 days of immersion in DWWW-2.

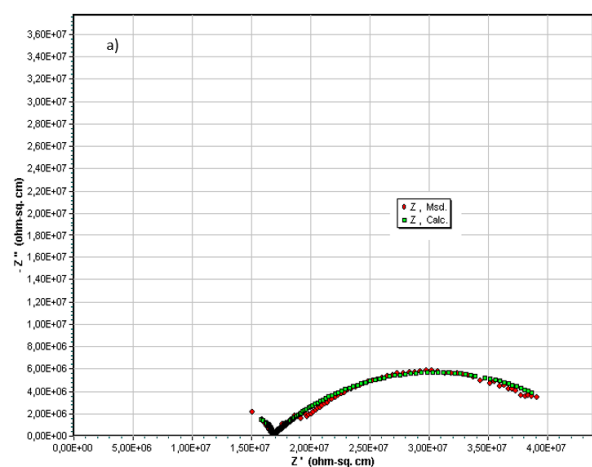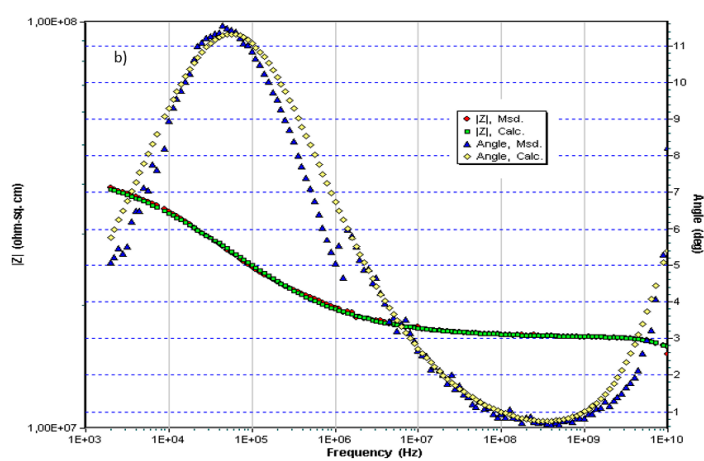

Figure S6. The Nyquist (a) and Bode (b) diagram after 30 days of immersion in DWWW-3.

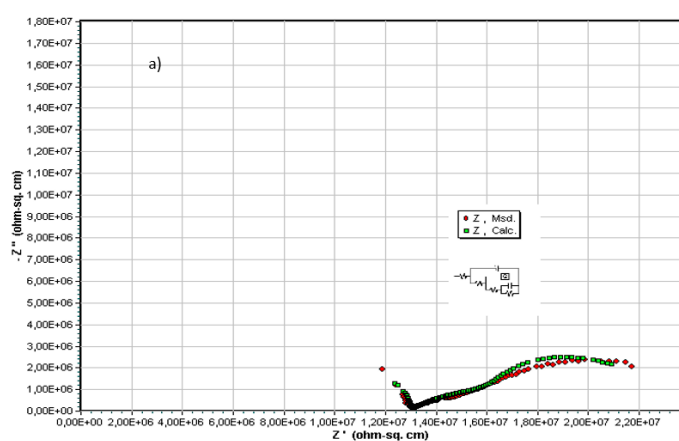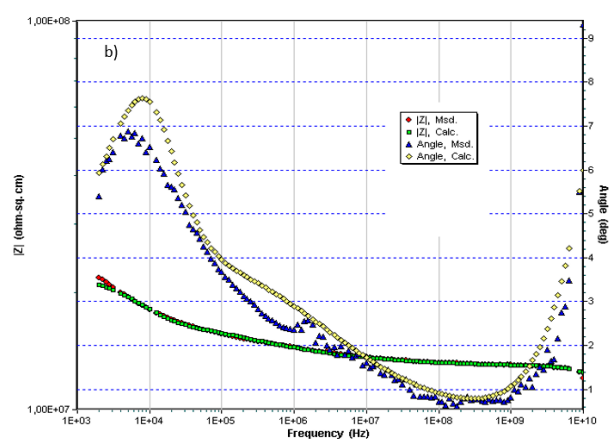

Figure S7. The Nyquist (a) and Bode (b) diagram after 65 days of immersion in DWWW-2.

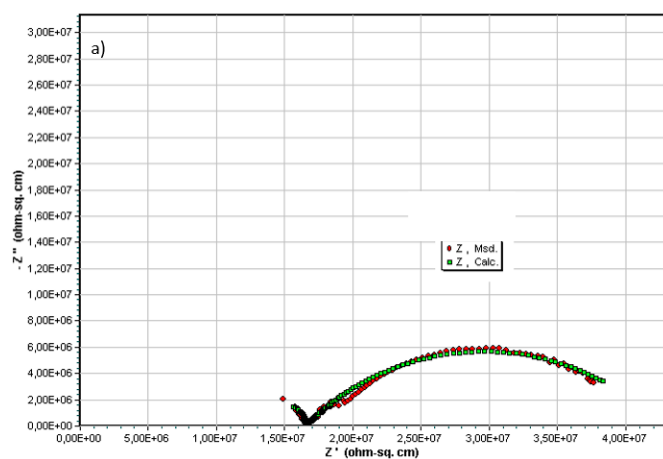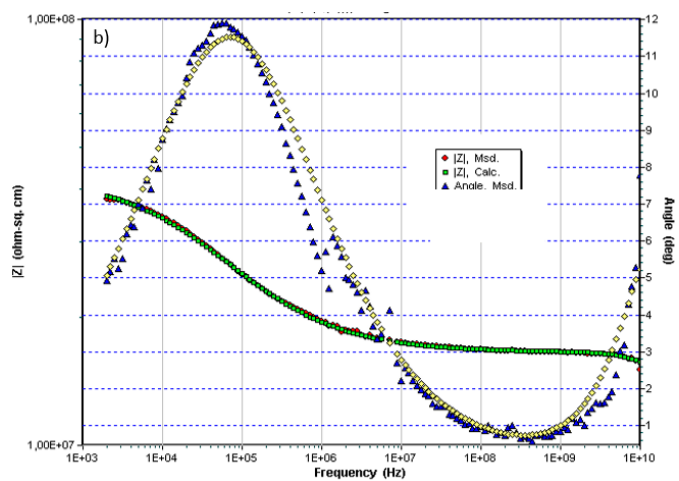

Figure S8. The Nyquist (a) and Bode (b) diagram after 65 days of immersion in DWWW-3.

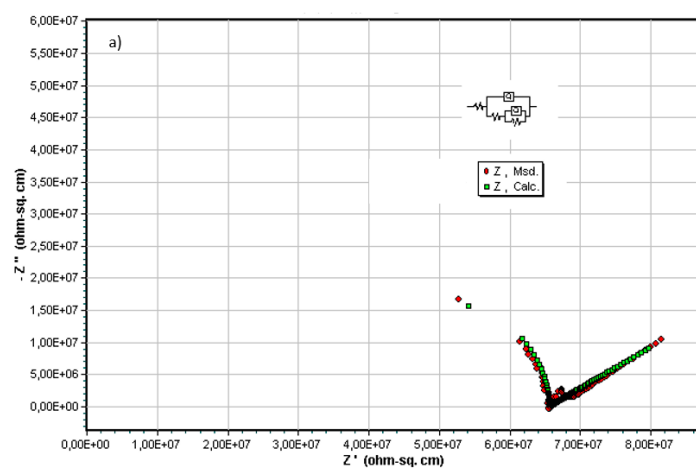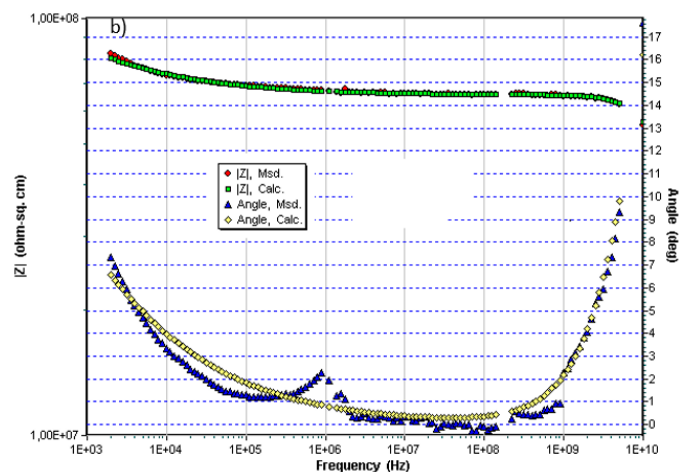

Figure S9. The Nyquist (a) and Bode (b) diagram after 90 days of immersion in DWWW-1.

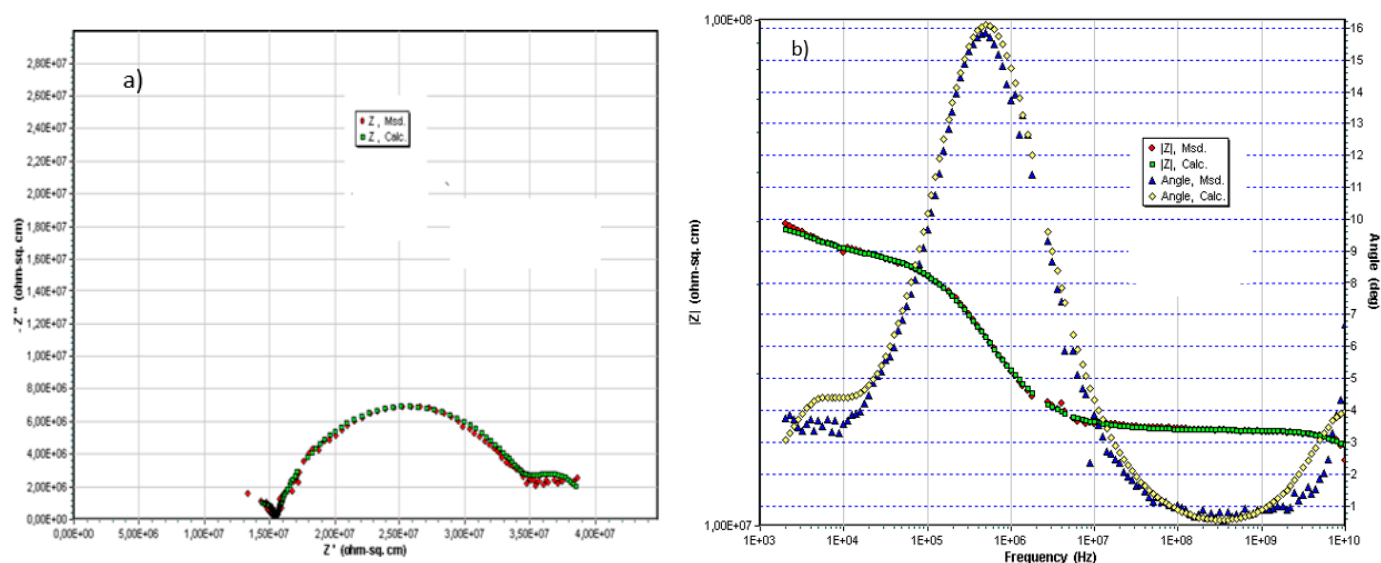

Figure S10. The Nyquist (a) and Bode (b) diagram after 90 days of immersion in DWWW-2.

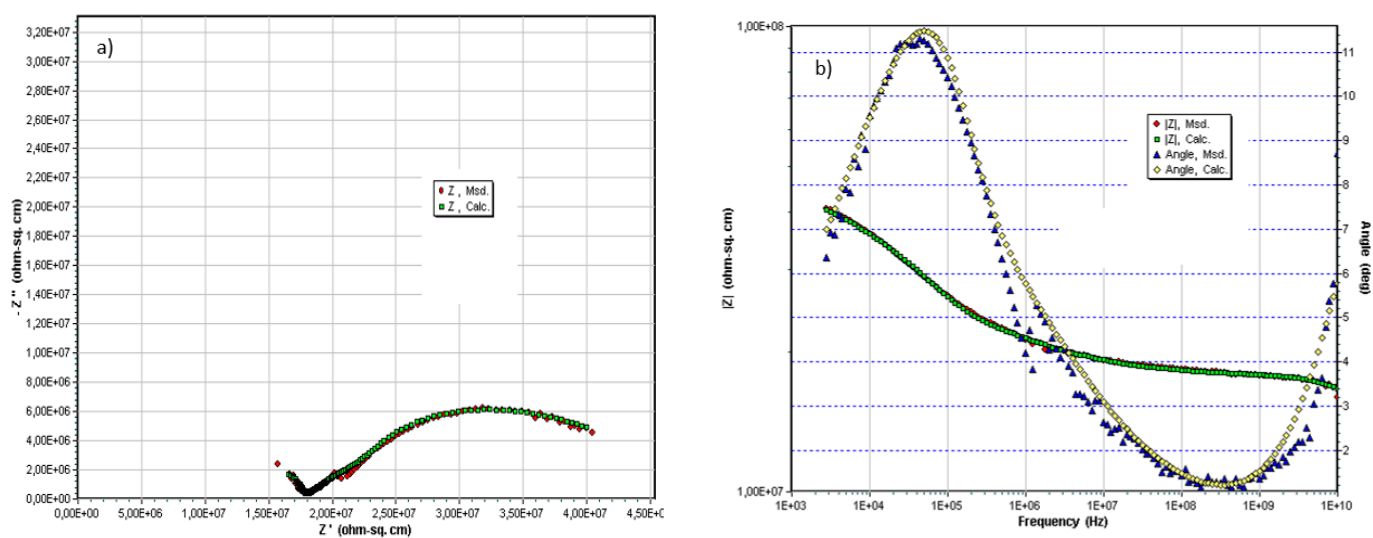

Figure S11. The Nyquist (a) and Bode (b) diagram after 90 days of immersion in DWWW-3.
